# Supplementary material for: Establishment of a Novel Anti-CD44 Variant 10 Monoclonal Antibody C44Mab-18 for Immunohistochemical Analysis against Oral Squamous Cell Carcinomas
Source: MDPI journal article supplement (doi:10.3390/cimb45070333), 2023-06-21
Supplement: s1 [file s1]

**Table S1.** The determination of the binding epitope of C<sub>44</sub>Mab-18 by ELISA.

| Peptide      | Coding exon* | Sequence             | C <sub>44</sub> Mab-18 |
|--------------|--------------|----------------------|------------------------|
| CD44p221–240 | 5/v3         | ATSTSSNTISAGWEPNEENE | –                      |
| CD44p231–250 | v3           | AGWEPNEENEDERDRHLSFS | –                      |
| CD44p241–260 | v3           | DERDRHLSFSGSGIDDDDEF | –                      |
| CD44p251–270 | v3/v4        | GSGIDDDDEFISSTISTTPR | –                      |
| CD44p261–280 | v3/v4        | ISSTISTTPRAFDHTKQNQD | –                      |
| CD44p271–290 | v4           | AFDHTKQNQDWTQWNPSHSN | –                      |
| CD44p281–300 | v4           | WTQWNPSHSNPEVLLQTTR  | –                      |
| CD44p291–310 | v4/v5        | PEVLLQTTRMTDVRNGTT   | –                      |
| CD44p301–320 | v4/v5        | MTDVRNGTTAYEGNWNPEA  | –                      |
| CD44p311–330 | v5           | AYEGNWNPEAHPPLIHHEHH | –                      |
| CD44p321–340 | v5           | HPPLIHHEHHEEEETPHSTS | –                      |
| CD44p331–350 | v5/v6        | EEEETPHSTSTIQATPSSTT | –                      |
| CD44p341–360 | v5/v6        | TIQATPSSTTEETATQKEQW | –                      |
| CD44p351–370 | v6           | EETATQKEQWFGNRWHEGYR | –                      |
| CD44p361–380 | v6           | FGNRWHEGYRQTPREDSHST | –                      |
| CD44p371–390 | v6/v7        | QTPREDSHSTTGTAASAHT  | –                      |
| CD44p381–400 | v6/v7        | TGTAASAHTSHPMQGRTP   | –                      |
| CD44p391–410 | v7           | SHPMQGRTPSPEDSSWTF   | –                      |
| CD44p401–420 | v7           | SPEDSSWTFNPNISHPMGR  | –                      |
| CD44p411–430 | v7/v8        | FNPISHPMGRGHQAGRRMDM | –                      |
| CD44p421–440 | v7/v8        | GHQAGRRMDMDSSHSTTLQP | –                      |
| CD44p431–450 | v8           | DSSHSTTLQPTANPNTGLVE | –                      |
| CD44p441–460 | v8           | TANPNTGLVEDLDRTGPLSM | –                      |
| CD44p451–470 | v8/v9        | DLDRTPGLSMTTQQSNSQSF | –                      |
| CD44p461–480 | v8/v9        | TTQQSNSQSFSTSHGLEED  | –                      |
| CD44p471–490 | v9           | STSHGLEEDKDHPTTSTLT  | –                      |
| CD44p481–500 | v9/v10       | KDHPTTSTLTSSNRNDVTGG | –                      |
| CD44p491–510 | v9/v10       | SSNRNDVTGGRRDPNHSEGS | –                      |
| CD44p501–520 | v10          | RRDPNHSEGSTTLLEGYTS  | –                      |
| CD44p511–530 | v10          | TTLLEGYTSHPHTKESRTF  | –                      |
| CD44p521–540 | v10          | YPHTKESRTFIPVTSKTS   | –                      |
| CD44p531–550 | v10          | IPVTSKTSFGVTAVTVGD   | –                      |

|              |        |                      |   |
|--------------|--------|----------------------|---|
| CD44p541-560 | v10    | FGVTAVTVGDSNSNVNRSLS | - |
| CD44p551-570 | v10/16 | SNSNVNRSLSGDQDTFHPSG | + |

+, OD<sub>655</sub>≥0.4; -, OD<sub>655</sub><0.1

\*The CD44 exon-coding regions are illustrated in Figure 1.
